# Supplementary material for: Speciation over the edge: gene flow among non-human primate species across a formidable biogeographic barrier
Source: PubMed Central journal article supplement (PMC5666242; doi:10.1098/rsos.170351), 2017-10-18
Supplement: rsos170351supp1.pdf [file rsos170351supp1.pdf]

## 734 **Supplementary Information**

### 735 **Taxonomy of silenus group macaques**

736 Macaques are divided into four species groups based on morphology [1, 2] and these  
737 groups each correspond to distinct phylogenetic clades [3]. The silenus group in-  
738 cludes the liontail macaque *M. silenus*, which occurs in southwest India, and several  
739 species from Southeast Asia, which are the focus of this study, including the pig-  
740 tail macaque (*M. nemestrina*) and the Sulawesi macaques: *M. tonkeana*, *M. maura*,  
741 *M. ochreata*, *M. brunnescens*, *M. hecki*, *M. nigrescens*, *M. nigra* [4, 5]. Within *M.*  
742 *tonkeana*, individuals in the west and east are significantly differentiated from each  
743 other [6] and the latter population is also known as *M. togeanus* [7]. *Macaca nemest-*  
744 *rina*, as recognized by Fooden (1975), has been divided into several species including  
745 representatives from the Sunda Region (Sumatra, Borneo, Peninsular Malaysia – *M.*  
746 *nemestrina*), from the Mentawai Islands (*M. siberu* and *M. pagensis*; [8]), and from  
747 the northern portion of their range (*M. leonina*) [9]. Macaques, along with tarsiers  
748 and humans, are the only primates that have dispersed across Wallace’s Line.

### 749 **Genetic samples**

750 RADseq data was collected from 40 samples in total, including representatives of all  
751 species from Sulawesi: *M. brunnescens* (1 female), *M. hecki* (4 females, 2 males), *M.*  
752 *maura* (2 females, 4 males), *M. nigra* (2 females, 1 male), *M. nigrescens* (1 female,  
753 1 male), *M. ochreata* (1 female, 2 males), *M. tonkeana* (1 female, 8 males), and

754 *M. togeanus* (1 female, 1 male), seven *M. nemestrina* individuals, including four  
755 from Borneo (1 female, 3 males), two from Sumatra (both female), and one from  
756 Peninsular Malaysia (a female), and one female *M. siberu* from Siberut Island in the  
757 Mentawai Archipelago.

## 758 **Data**

759 The RADseq dataset had a substantial amount of missing data in an alignment of all  
760 samples; for autosomal DNA there was an average of 52.2% missing data per taxon  
761 (range 42.0% – 78.1%) and for the X there was an average of 42.8% (range 24.1% –  
762 84.1%). Three individuals had over 70% missing data in the X and in the autosomal  
763 data: *M. maura* PM613, *M. nigrescens* PF654, and *M. ochreata* PM596. A summary  
764 of sequence data statistics for each sample is provided in Supplementary Table S1.

## 765 **Genotyping**

766 A general description of our bioinformatics pipeline is presented in the Methods. To  
767 supplement this, we include below examples of the commandlines used for generating  
768 the initial genotype files for the WGS data.

769 

---

  
770 **#ALIGN:**

```
771 {bwa} mem -M -t 10 {reference} {R1_fastq} {R2_fastq} | {samtools} view  
772     -Shb -o {outputDir}/{lane}.mem.bam -
```

773

774 **#SORTBAM:**

```

775 {java} -Djava.io.tmpdir={javaTmpDir} -Xmx24576m -jar
776     {picard}/AddOrReplaceReadGroups.jar MAX_RECORDS_IN_RAM=2000000
777     CREATE_INDEX=true SORT_ORDER=coordinate VALIDATION_STRINGENCY=SILENT
778     I={outputDir}/{lane}.mem.bam O={lane_bam} RGID={lane} RGLB={sample}
779     RGSM={sample} RGPU="Unknown" RGCN={center} RGDS="RefVersion:rheMac2"
780     RGPL="illumina"
781
782 #MERGE:
783 {java} -Djava.io.tmpdir={javaTmpDir} -Xmx24576m -jar
784     {picard}/MergeSamFiles.jar USE_THREADING=true
785     MAX_RECORDS_IN_RAM=2000000 CREATE_INDEX=true
786     VALIDATION_STRINGENCY=SILENT INPUT={lane_bam_merge_string}
787     OUTPUT={outputDir}/{sample}.merged.bam
788 {java} -Djava.io.tmpdir={javaTmpDir} -XX:ParallelGCThreads=5 -Xmx24576m
789     -jar {picard}/MarkDuplicates.jar MAX_RECORDS_IN_RAM=2000000
790     VALIDATION_STRINGENCY=SILENT CREATE_INDEX=true
791     M={outputDir}/{sample}.dedup.metrics I={outputDir}/{sample}.merged.bam
792     O={outputDir}/{sample}.dedup.bam
793
794 #REALIGN_CREATOR:
795 {java} -Djava.io.tmpdir={javaTmpDir} -Xmx24576m -jar {gatk} -T
796     RealignerTargetCreator --interval_padding 200 -rf BadCigar -nt 4 -R
797     {reference} -I {outputDir}/{sample}.dedup.bam -o
798     {outputDir}/{sample}.forRealigner.intervals

```

799

800 #REALIGN:

```
801 {java} -Djava.io.tmpdir={javaTmpDir} -Xmx24576m -jar {gatk} -T
802     IndelRealigner -dcov 1000 -rf BadCigar --consensusDeterminationModel
803     USE_READS -R {reference} -targetIntervals
804     {outputDir}/{sample}.forRealigner.intervals -I
805     {outputDir}/{sample}.dedup.bam -o {outputDir}/{sample}.realigned.bam
```

806

807

808 #BQSR:

```
809 {java} -Djava.io.tmpdir={javaTmpDir} -Xmx24576m -jar {gatk} -T
810     BaseRecalibrator --interval_padding 200 -rf BadCigar
811     --downsample_to_fraction 0.1 -nct 4 -R {reference} -I
812     {outputDir}/{sample}.realigned.bam -o {outputDir}/{sample}.recal.grp
813     -knownSites {bqsr_sites_file}
```

```
814 {java} -Djava.io.tmpdir={javaTmpDir} -Xmx24576m -jar {gatk} -T PrintReads
815     -nct 4 -rf BadCigar --disable_indel_qual --emit_original_qual -R
816     {reference} -I {outputDir}/{sample}.realigned.bam -o
817     {outputDir}/{sample}.final.bam -BQSR {outputDir}/{sample}.recal.grp
```

818

819

820 #HAPLOTYPECALLER:

```
821 {java} -XX:ParallelGCThreads=2 -Djava.io.tmpdir={javaTmpDir} -Xmx65536M
822     -jar {gatk} -T HaplotypeCaller --genotyping_mode DISCOVERY -A
```

```
823 AlleleBalanceBySample -A DepthPerAlleleBySample -A DepthPerSampleHC -A
824 InbreedingCoeff -A MappingQualityZeroBySample -A StrandBiasBySample -A
825 Coverage -A FisherStrand -A HaplotypeScore -A
826 MappingQualityRankSumTest -A MappingQualityZero -A QualByDepth -A
827 RMSMappingQuality -A ReadPosRankSumTest -A VariantType -A
828 StrandOddsRatio --emitRefConfidence GVCF -l INFO -rf BadCigar -R
829 {reference} -nct 1 -I {outputDir}/{sample}.final.bam -o
830 {outputDir}/{sample}_{intervalName}.g.vcf -L {intervalValue}
831
832 #COMPRESS/INDEX:
833 {bgzip} -f {outputDir}/{sample}_{intervalName}.g.vcf
834 {tabix} -f -p vcf {outputDir}/{sample}_{intervalName}.g.vcf.gz
835
836 #MERGE/EMIT:
837 {java} -XX:ParallelGCThreads=2 -Djava.io.tmpdir={javaTmpDir} -Xmx65536M
838 -jar {gatk} org.broadinstitute.gatk.tools.CatVariants -R {reference}
839 --assumeSorted {vcf_list} -o {outputDir}/{sample}.g.vcf.gz
840 {java} -XX:ParallelGCThreads=2 -Djava.io.tmpdir={javaTmpDir} -Xmx65536M
841 -jar {gatk} -T GenotypeGVCFs -R {reference} --variant
842 {outputDir}/{sample}.g.vcf.gz -o {outputDir}/{sample}.vcf
843
844 #COMPRESS/INDEX:
845 {bgzip} -f {outputDir}/{sample}.vcf
846 {tabix} -f -p vcf {outputDir}/{sample}.vcf.gz
847
```

---

## 848 **Alignments for phylogenetic analysis**

849 The alignment of autosomal RADseq data, including gapped positions, was 10,639,115  
850 bp (out of a total genome size of about 3 Gigabases), and 91.6% of these positions  
851 were invariant. For the X, the alignment including gapped positions was 217,762 bp,  
852 and 92.7% of these were invariant.

## 853 **Divergence**

854 Based on the WGS data, genome-wide divergence per site between either of the  
855 Sulawesi species and the pigtailed macaque was 0.5% for autosomal DNA and 0.3%  
856 for the X. Divergence between *M. tonkeana* and *M. nigra* was 0.3% for the autosomes  
857 and 0.2% on the X. Similar to the results from analysis of the X/A polymorphism  
858 ratio discussed below, a higher level of divergence on the autosomes compared to the  
859 X is consistent with faster male evolution.

## 860 **The X/A polymorphism ratio**

861 In a constant sized population with equal variance in reproductive success between  
862 the sexes, the null expectation for the relative level of polymorphism on the X and  
863 autosomes is 0.75 [10]. We used two approaches to test this null hypothesis, with  
864 our analyses focused on each of the four species or populations for which we had  
865 data from at least four individuals in the RADseq data. This included *M. tonkeana*  
866 (9 individuals), *M. maura* (5 or 6 individuals depending on the analysis; see below),

867 *M. hecki* (6 individuals), and *M. nemestrina* from Borneo (4 individuals). We ex-  
868 cluded data from the east population of *M. tonkeana* (i.e., *M. togeanus*) and the *M.*  
869 *nemestrina* populations from Sumatra and Peninsular Malaysia to reduce the effects  
870 of population subdivision on the results.

871 As described in Evans et al. 2014, the first method standardized the ratio of pair-  
872 wise nucleotide diversity per site ( $\pi$ ) on the X over that of the autosomes using the  
873 Jukes-Cantor corrected (1969) divergence from baboons for the X and autosomes,  
874 respectively, and included a correction for ancestral polymorphism as detailed in  
875 Charlesworth and Charlesworth (2010). Because this method required no missing  
876 data within a species in order for a site to be considered, we excluded *M. maura*  
877 individual PM613 due to low coverage. The second method estimated the X/A  
878 polymorphism ratio ( $\lambda$ ) using a model of evolution that included the possibility of  
879 a dynamic demographic history and natural selection on GC content (and/or GC-  
880 biased gene conversion), as described elsewhere [11, 14–17]. Thus,  $N_{eX} = \lambda N_{eA}$ , where  
881  $N_{eX}$  and  $N_{eA}$  are the effective population sizes of the X and autosomes, respectively,  
882 and  $\lambda$  is not influenced by differences between these genomic regions in mutation  
883 rate. This model allowed for missing data, so no individuals were excluded within  
884 each of these species or populations. The models to which the data from each species  
885 were fitted have several parameters, and include a ‘full’ model in which all param-  
886 eters are estimated independently, and several nested models in which one or more  
887 parameters are fixed to some constant, or set to be equivalent to one another. The  
888 full model included two time intervals with different effective population sizes with  
889 instantaneous change between the ancestral and recent population size occurring  $\tau$

890 generations ago, and the ratio of the current to ancestral population size being equal  
891 to  $\rho$ . To account for the possibility that natural selection acted on GC content,  
892 or the equivalent genomic effects of GC-biased gene conversion, we fitted the data  
893 to a model of evolution between two types of nucleotides: those with a weak bond  
894 (adenosines and thymines) and those with a strong bond (guanines and cytosines).  
895 The polymorphism data were recoded to include only variable sites in which a gua-  
896 nine (G) or a cytosine (C) nucleotide was segregating with an adenine (A) or a  
897 thymine (T). In these models, the parameters  $\theta_{01}$  and  $\theta_{10}$  refer to the mutation pa-  
898 rameters from G or C nucleotides to A or T nucleotides, and the reverse, respectively,  
899 as detailed in Evans et al. 2014. The parameter  $\gamma$  reflects whether GC-biased gene  
900 conversion (gBGC) or natural selection on GC content favors an increase in GC con-  
901 tent (a positive parameter value) or a decrease in GC content (a negative parameter  
902 value). In the full model,  $\gamma$  is estimated separately for the autosomes ( $\gamma_A$ ) and the  
903 X ( $\gamma_X$ ), and in some of the nested models  $\gamma_A$  and  $\gamma_X$  are set to be equivalent and/or  
904 equal to zero, which corresponds to no gBGC or neutrality of GC content. The  
905 polymorphism data were also fitted to an equilibrium model in which population  
906 size is constant and for which there is no X/A polymorphism ratio ( $\lambda$ ) parameter.  
907 More detailed information and the statistical rationale for these models are avail-  
908 able elsewhere [11, 14–17]. If the equilibrium model was poorly supported, weighted  
909 parameter estimates were then calculated across all models using AIC weights, as  
910 described by Wagenmakers and Farrell 2004.



911 **Low molecular polymorphism on the X can be explained by demography**  
912 **and natural selection**

913 Fig. S2 depicts the X/A polymorphism ratio calculated from standardized  $\pi$  using  
914 RADseq data from four species, after separating the polymorphism data into cate-  
915 gories based on genomic position relative to annotated genes in the rhesus genome.  
916 Additional polymorphism statistics are presented in Supplementary Tables S3 – S6.  
917 As expected, diversity and divergence was similar in *M. tonkeana* to that previously  
918 reported based on an expanded dataset that included paired-end sequences [11], even  
919 though there were differences in the bioinformatic analyses of each study.

920 In the four species in which we assessed population genetic variation, *M. nemest-*  
921 *rina* from Borneo was the most polymorphic. The 95% CIs for  $\pi$  and  $\theta_W$  overlapped  
922 for the three Sulawesi species with population genetic data from at least 4 individuals  
923 (*M. tonkeana*, *M. maura*, and *M. hecki*). In genomic regions far from genes, which  
924 presumably are least affected by natural selection, the X/A polymorphism ratio was  
925 lower than expectations (Fig. S2). However, in these genomic regions Tajima’s D of  
926 autosomal DNA was significantly negative (Tables S3 – S6), indicating an excess of  
927 low frequency polymorphisms. This could stem from population expansion, although  
928 in *M. maura*, the 95% CI for this parameter was near zero suggesting population size  
929 of that species may have varied less than that of the others.

930 That Tajima’s D is significantly different from zero provides circumstantial evi-  
931 dence for a dynamic demography in at least some of these species, and changes in  
932 population size are known to influence the X/A polymorphism ratio [19]. Addition-

933 ally, other factors such as gBGC or natural selection on GC content have the potential  
934 to affect the X/A polymorphism ratio (e.g., Evans et al. 2014). For these reasons,  
935 we fitted the polymorphism data from genomic regions far (>51,000 bp) from genes  
936 to several models of evolution to polymorphism data from the X and autosome for  
937 each of the four populations or species for which we had data from >3 individuals.  
938 For the three species where the equilibrium model (with no change in population size  
939 over time) was not supported, the weighted average of parameter estimates over all  
940 models based on AIC weights are presented in Table S11. Parameter estimates for  
941 each model for each species or population are presented in Supplemental Tables S7  
942 – S9.

943 *M. maura* was unusual among the 4 populations we tested because the equilibrium  
944 model was provided a relatively good fit to the data. This is illustrated by the AIC  
945 weight for the equilibrium model ( $\infty$ ) in Table S9 that is over twice as high as that  
946 of any other model. The other three populations/species each had evidence for a  
947 dynamic demography and zero weight for the equilibrium model.

948 For all species, gBGC and/or selection favoring increased GC content is supported  
949 because the the maximum likelihood estimates and/or model averages for the gBGC  
950 parameters on the autosomes and the X,  $\gamma_A$  and  $\gamma_X$  respectively, are greater than  
951 zero. This indicates that gBGC and/or selection for GC content favor an increase  
952 in GC content (Table S11). Moreover, all models that set  $\gamma_A$  or  $\gamma_X$  equal to zero  
953 had low AIC weights (Tables S7 – S9). If the strength of gBGC and/or selection  
954 favoring increased GC is similar on the X and autosomes, we expect  $\gamma_X = \lambda\gamma_A$ ; for  
955 all four species/populations the AIC weights of these models were high compared

956 to the other models that relaxed this constraint, suggesting that the forces driving  
957 GC-biased molecular evolution in these genomic regions were indeed similar. This  
958 latter finding was also recovered previously for *M. tonkeana* [11] using an expanded  
959 dataset from that species that also analyzed paired end sequences from RADseq.

960 In this analysis, variable positions are re-coded into two states,  $A_0$  and  $A_1$ , where  
961  $A_0$  refers to G or C nucleotides and  $A_1$  refers to A or T nucleotides (see Methods).  
962 Additionally,  $\theta_{01} = 4N_e\mu_{01}$ , where  $\mu_{01}$  represents the mutation rate from  $A_0 \rightarrow A_1$ ,  
963 and  $\theta_{10} = 4N_e\mu_{10}$ , where  $\mu_{10}$  represents the mutation rate from  $A_1 \rightarrow A_0$ . In all  
964 species,  $\theta_{01} > \theta_{10}$  for the X and for the autosomes (Table S11). This suggests that in  
965 each of these different species there are more variable positions in which a G or a C  
966 is the major (more common) allele than where an A or a T is the major allele. Also  
967 of interest is the observation that in each species,  $\theta_{ijA} \lambda / \theta_{ijX} > 1$ , where ij is 01 or  
968 10 and A and X refer to the autosomes and X respectively. This indicates that the  
969 mutation rate is higher in the autosomes than in the X, which is suggestive of male  
970 driven evolution – a result that is also suggested by pairwise divergence between the  
971 three species for which we performed WGS as described below.

972 Thus, while we recovered significantly lower polymorphism on the X than ex-  
973 pected based on  $\pi$  in four macaque species, in each one this could be accounted  
974 for by an evolutionary model that includes a dynamic demography and selection on  
975 gBGC/natural selection on GC content. One factor not incorporated in these anal-  
976 yses and that is beyond the scope of this study is the possibility that hybridization  
977 among species via male dispersal could influence the X/A ratio. As discussed above,  
978 most papionin monkeys have female philopatry and hybridization has been detected

979 between all parapatric species pairs on Sulawesi. If hybridization were mostly medi-  
980 ated by male migration, diversity in the autosomes would be increased to a greater  
981 extent than the X. This possibility could explain the lower (but not significantly so)  
982 levels of diversity on the X. Added to this, other factors such as natural selection in  
983 males on deleterious recessive mutations, could also decrease diversity on the X.

## 984 References

- 985 [1] Fooden, J. Provisional classification and key to living species of macaques (Pri-  
986 mates: *Macaca*). *Folia primatologica*, **25**, (1976) 225–236.
- 987 [2] Delson, E. Fossil macaques, phyletic relationships and a scenario of deployment.  
988 *The Macaques: Studies in ecology, behavior and evolution*, (1980) 10–30.
- 989 [3] Tosi, A. J., Morales, J. C., and Melnick, D. J. Paternal, maternal, and bi-  
990 parental molecular markers provide unique windows onto the evolutionary his-  
991 tory of macaque monkeys. *Evolution*, **57**, (2003) 1419–1435.
- 992 [4] Fooden, J. Taxonomy and evolution of liontail and pigtail macaques (Primates  
993 : Cercopithecidae). *Fieldiana Zoology*, **67**, (1975) 1–169.
- 994 [5] Fooden, J. *Taxonomy and evolution of the monkeys of Celebes* Karger Basel,  
995 1969.
- 996 [6] Evans, B., Supriatna, J., and Melnick, D. Hybridization and population genet-  
997 ics of two macaque species in Sulawesi, Indonesia. *Evolution*, **55**, (2001) 1686–  
998 1702.

- 999 [7] Froehlich, J. W. and Supriatna, J. Secondary intergradation between *Macaca*  
1000 *maurus* and *M. tonkeana* in South Sulawesi, and the species status of *M. to-*  
1001 *geanus*. *Evolution and ecology of macaque societies*, (1996) 43–70.
- 1002 [8] Roos, C., Ziegler, T., Hodges, J. K., Zischler, H., and Abegg, C. Molecular  
1003 phylogeny of Mentawai macaques: taxonomic and biogeographic implications.  
1004 *Molecular Phylogenetics and Evolution*, **29**, (2003) 139–150.
- 1005 [9] Groves, C. P. *Primate taxonomy* Smithsonian Books, 2001.
- 1006 [10] Charlesworth, B. Effective population size and patterns of molecular evolution  
1007 and variation. *Nature Reviews Genetics*, **10**, (2009) 195–205.
- 1008 [11] Evans, B. J., Zeng, K., Esselstyn, J. A., Charlesworth, B., and Melnick, D. J.  
1009 Reduced representation genome sequencing suggests low diversity on the sex  
1010 chromosomes of tonkean macaque monkeys. *Molecular Biology and Evolution*,  
1011 **31**, (Sept. 2014) 2425–2440.
- 1012 [12] Jukes, T. H. and Cantor, C. R. Evolution of protein molecules. *Mammalian*  
1013 *Protein Metabolism*, **3**, (1969) 132.
- 1014 [13] Charlesworth, B. and Charlesworth, D. *Elements of Evolutionary Genetics*  
1015 Roberts Publishers, 2010.
- 1016 [14] Haddrill, P. R., Zeng, K., and Charlesworth, B. Determinants of synonymous  
1017 and nonsynonymous variability in three species of *Drosophila*. *Molecular Biol-*  
1018 *ogy and Evolution*, **28**, (2011) 1731–1743.
- 1019 [15] Zeng, K. and Charlesworth, B. Studying patterns of recent evolution at synony-  
1020 mous sites and intronic sites in *Drosophila melanogaster*. *Journal of Molecular*  
1021 *Evolution*, **70**, (2010) 116–128.

- 1022 [16] Zeng, K. and Charlesworth, B. The joint effects of background selection and  
1023 genetic recombination on local gene genealogies. *Genetics*, **189**, (2011) 251–  
1024 266.
- 1025 [17] Zeng, K. and Charlesworth, B. Estimating selection intensity on synonymous  
1026 codon usage in a nonequilibrium population. *Genetics*, **183**, (2009) 651–662.
- 1027 [18] Wagenmakers, E.-J. and Farrell, S. AIC model selection using Akaike weights.  
1028 *Psychonomic Bulletin & Review*, **11**, (2004) 192–196.
- 1029 [19] Pool, J. E. and Nielsen, R. Population size changes reshape genomic patterns  
1030 of diversity. *Evolution*, **61**, (2007) 3001–3006.

## Supplementary Tables and Figures

Table S1: Information on sequence data analyzed in this study including the species (Species), sample identification number (SampleID), sex (Sex), number of reads before and after trimming (Untrimmed and Trimmed, respectively), read length after trimming if performed or before trimming for the HiSeqX data (Readlength), GC content (GC), and the number of mapped reads (mapped). For the HiSeqX data, trimming was not performed (np). Mapped reads were computed for RADseq and HiSeqX data by the flagstat command of SAMTOOLS and GATK, respectively.

| Species              | SampleID | Sex | Untrimmed | Trimmed  | Readlength | GC | mapped  |
|----------------------|----------|-----|-----------|----------|------------|----|---------|
| RADseq               |          |     |           |          |            |    |         |
| <i>M. nemestrina</i> | Gumgum   | F   | 3609945   | 3503070  | 36-75      | 52 | 2413976 |
| <i>M. nemestrina</i> | Kedurang | F   | 2811747   | 2686390  | 36-75      | 52 | 1837733 |
| <i>M. nemestrina</i> | Malay    | F   | 2888661   | 2820801  | 36-75      | 52 | 1926671 |
| <i>M. nemestrina</i> | Ngasang  | F   | 1863406   | 1819857  | 36-75      | 52 | 1250488 |
| <i>M. nemestrina</i> | PM664    | M   | 4794910   | 4720761  | 36-75      | 52 | 3242719 |
| <i>M. nemestrina</i> | PM665    | M   | 8785118   | 2447219  | 36-75      | 53 | 1666291 |
| <i>M. nemestrina</i> | Sukai    | M   | 2561836   | 2505653  | 36-75      | 53 | 1777480 |
| <i>M. siberu</i>     | pagensis | F   | 2374748   | 2315204  | 36-75      | 53 | 1602553 |
| <i>M. nigra</i>      | PF1001   | F   | 1103174   | 1726287  | 36-75      | 53 | 1193708 |
| <i>M. nigra</i>      | PF660    | F   | 1767769   | 1080813  | 36-75      | 53 | 744724  |
| <i>M. nigra</i>      | PM1003   | M   | 2709319   | 2637075  | 36-75      | 53 | 1847731 |
| <i>M. nigrescens</i> | PF654    | F   | 3259548   | 911105   | 36-75      | 53 | 472852  |
| <i>M. nigrescens</i> | PM1000   | M   | 2860128   | 2778827  | 36-75      | 53 | 1935144 |
| <i>M. hecki</i>      | PF643    | F   | 5770315   | 5628031  | 36-75      | 53 | 3888077 |
| <i>M. hecki</i>      | PF644    | F   | 9630884   | 9306553  | 36-75      | 54 | 6627357 |
| <i>M. hecki</i>      | PF648    | F   | 4852016   | 4768222  | 36-75      | 53 | 3322875 |
| <i>M. hecki</i>      | PF651    | F   | 5038203   | 5035540  | 36-75      | 53 | 3509593 |
| <i>M. hecki</i>      | PM639    | M   | 5269803   | 5154271  | 36-75      | 53 | 3551944 |
| <i>M. hecki</i>      | PM645    | M   | 5855161   | 5746693  | 36-75      | 53 | 3974092 |
| <i>M. maura</i>      | PF615    | F   | 5625181   | 5532103  | 36-75      | 53 | 3815996 |
| <i>M. maura</i>      | PF713    | F   | 10698886  | 10557589 | 36-75      | 54 | 7524686 |
| <i>M. maura</i>      | PM613    | M   | 935933    | 921611   | 36-75      | 53 | 637370  |
| <i>M. maura</i>      | PM614    | M   | 4160191   | 4058140  | 36-75      | 53 | 2843009 |
| <i>M. maura</i>      | PM616    | M   | 6667369   | 6526349  | 36-75      | 53 | 4530947 |
| <i>M. maura</i>      | PM618    | M   | 4285281   | 4160860  | 36-75      | 54 | 2969422 |
| <i>M. tonkeana</i>   | PF515    | F   | 11982906  | 11702493 | 36-75      | 53 | 8148982 |
| <i>M. tonkeana</i>   | PM561    | M   | 11624883  | 11309233 | 36-75      | 53 | 7841954 |
| <i>M. tonkeana</i>   | PM565    | M   | 12132625  | 11852221 | 36-75      | 53 | 8241475 |
| <i>M. tonkeana</i>   | PM566    | M   | 9921261   | 9688908  | 36-75      | 53 | 6712122 |
| <i>M. tonkeana</i>   | PM567    | M   | 11892242  | 11561026 | 36-75      | 53 | 8033420 |
| <i>M. tonkeana</i>   | PM582    | M   | 12296341  | 11967241 | 36-75      | 54 | 8439642 |
| <i>M. tonkeana</i>   | PM584    | M   | 12812865  | 12442854 | 36-75      | 53 | 8654276 |
| <i>M. tonkeana</i>   | PM592    | M   | 13843609  | 13368052 | 36-75      | 54 | 9412709 |
| <i>M. tonkeana</i>   | PM602    | M   | 13737591  | 13373987 | 36-75      | 54 | 9521922 |

Continued on next page

Continued from previous page

| Species               | SampleID | Sex | Untrimmed | Trimmed | Readlength | GC | mapped    |
|-----------------------|----------|-----|-----------|---------|------------|----|-----------|
| <i>M. togeanus</i>    | PF549    | F   | 1096486   | 1070693 | 36-75      | 53 | 741166    |
| <i>M. togeanus</i>    | PM545    | M   | 1783072   | 1762114 | 36-75      | 53 | 1239608   |
| <i>M. ochreata</i>    | PF625    | F   | 2164485   | 2128202 | 36-75      | 53 | 1477886   |
| <i>M. ochreata</i>    | PM571    | M   | 1687457   | 1667269 | 36-75      | 53 | 1169513   |
| <i>M. ochreata</i>    | PM596    | M   | 2414864   | 2124502 | 36-75      | 54 | 685724    |
| <i>M. brunnescens</i> | PF707    | F   | 2277761   | 2217043 | 36-75      | 53 | 1567209   |
| WGS                   |          |     |           |         |            |    |           |
| <i>M. nemestrina</i>  | PM664    | M   | 949729200 | np      | 151        | 41 | 927910917 |
| <i>M. nigra</i>       | PF660    | F   | 916229358 | np      | 151        | 41 | 894519506 |
| <i>M. tonkeana</i>    | PM592    | M   | 913316498 | np      | 151        | 41 | 892349062 |



Table S2: Gene flow statistics for the X chromosome calculated from data after different filtering steps, and using different outgroup taxa. The first panel indicates the  $f_{DM}$  statistic with confidence intervals in parentheses. The second panel indicates the number of ABBA, BABA, and BBAA sites in each analysis, with the definition of these site patterns provided in the main text. Each panel is divided into rows based on whether sites with heterozygous diploid genotypes were included and called as a haploid genotype based on depth (included), excluded if either or both males had a heterozygous diploid genotype (no male hets), or excluded if any individual had a heterozygous diploid genotype (no hets). For each of these filters, we calculated gene flow statistics after removing sites where any genotype had <5X or <12X coverage (5X or 12X respectively), using a rhesus or baboon outgroup (rhesus or baboon, respectively), and/or using a haploid genotype for all individuals or diploid genotype for the female all (all haploid or female diploid, respectively). In the top panel, asterisks indicate  $f_{DM}$  statistics whose confidence intervals are higher than zero, which is consistent with gene flow between *M. nemestrina* and *M. tonkeana*. In general, less data are considered by the analyses on the left and bottom of each panel.

|                | 5X, rhesus, all haploid      | 5X, rhesus, female diploid   | 5X, baboon, all haploid       | 12X, rhesus, all haploid     | 12X, baboon, all haploid     |
|----------------|------------------------------|------------------------------|-------------------------------|------------------------------|------------------------------|
| $f_{DM}$       |                              |                              |                               |                              |                              |
| included       | 0.30492 (0.16752 - 0.44232)* | 0.38206 (0.28071 - 0.48342)* | 0.16879 (0.07368 - 0.26390)*  | 0.31821 (0.17475 - 0.46167)* | 0.16973 (0.07373 - 0.26573)* |
| no male hets   | 0.07517 (0.02101 - 0.12933)* | 0.19022 (0.12465 - 0.25579)* | 0.03392 (-0.01003 - 0.07788)  | 0.04351 (-0.00781 - 0.09483) | 0.03408 (-0.00984 - 0.07801) |
| no hets        | 0.04690 (-0.01601 - 0.10980) | 0.04726 (-0.01560 - 0.11012) | -0.01926 (-0.07222 - 0.03369) | 0.04733 (-0.00489 - 0.09954) | 0.03851 (-0.00474 - 0.08176) |
| ABBA;BABA;BBAA |                              |                              |                               |                              |                              |
| included       | 3781; 2014; 40304            | 4156.5; 2401.5; 40312        | 3123; 2221; 30999             | 3457; 1788; 36736            | 2898; 2057; 28566            |
| no male hets   | 1938; 1667; 39825            | 2104.5; 1725; 39722.5        | 1905; 1780; 30349             | 1523; 1396; 35709            | 1608; 1502; 27426            |
| no hets        | 1518; 1382; 38538            | 1518; 1381; 38538            | 1451; 1508; 29363             | 1527; 1389; 35705            | 1618; 1498; 27424            |

Table S3: Borneo *M. nemestrina* polymorphism ( $n = 1$  female, 3 males). Data are divided into three categories based on their position relative to genes, including positions spanning genes  $\pm 1000$  bp in both directions (plusminus), positions 1000–51000 bp from genes (1000to51000), and positions  $>51000$  bp from genes (51000plus). Statistics include the number of sites genotyped (Sites), the number of RAD tags (RADtags), the number of segregating sites ( $S$ ), Watterson's  $\theta$  ( $\theta_W$ ), pairwise nucleotide diversity ( $\pi$ ), divergence from humans with Jukes-Cantor correction and correction for ancestral polymorphism (divergence), Tajima's D (TajD), and the number of singleton sites over the number of segregating sites ( $S_e/S$ ). 95% confidence intervals are in parentheses.

| Statistic         | plusminus                   | 1000to50000                 | 51000plus                   |
|-------------------|-----------------------------|-----------------------------|-----------------------------|
| <i>aDNA</i>       |                             |                             |                             |
| Sites             | 424889                      | 756435                      | 2471619                     |
| RADtags           | 4614                        | 8242                        | 27524                       |
| $S$               | 2862 (2759 - 2966)          | 5311 (5162 - 5463)          | 19342 (19048 - 19627)       |
| $\theta_W$        | 0.00260 (0.00250 - 0.00269) | 0.00271 (0.00263 - 0.00279) | 0.00302 (0.00297 - 0.00306) |
| $\pi$             | 0.00242 (0.00233 - 0.00251) | 0.00254 (0.00246 - 0.00262) | 0.00281 (0.00277 - 0.00285) |
| divergence        | 0.06065 (0.05989 - 0.06141) | 0.06363 (0.06303 - 0.06421) | 0.06637 (0.06601 - 0.06668) |
| $\pi$ /divergence | 0.040 (0.03829 - 0.04159)   | 0.040 (0.03869 - 0.04121)   | 0.042 (0.04165 - 0.04304)   |
| TajD              | -0.376 (-0.441 - -0.313)    | -0.339 (-0.384 - -0.294)    | -0.381 (-0.406 - -0.355)    |
| $S_e/S$           | 0.507 (0.489 - 0.526)       | 0.502 (0.488 - 0.516)       | 0.519 (0.512 - 0.526)       |
| <i>aDNA</i>       |                             |                             |                             |
| Sites             | 4803                        | 10354                       | 33621                       |
| RADtags           | 68                          | 139                         | 455                         |
| $S$               | 11 (5 - 18)                 | 21 (13 - 31)                | 78 (61 - 96)                |
| $\theta_W$        | 0.00125 (0.00057 - 0.00204) | 0.00111 (0.00068 - 0.00163) | 0.00127 (0.00099 - 0.00156) |
| $\pi$             | 0.00118 (0.00056 - 0.00194) | 0.00105 (0.00063 - 0.00153) | 0.00124 (0.00097 - 0.00152) |
| divergence        | 0.05906 (0.05166 - 0.06691) | 0.05166 (0.04712 - 0.05635) | 0.06343 (0.06071 - 0.06622) |
| $\pi$ /divergence | 0.020 (0.00924 - 0.03310)   | 0.020 (0.01208 - 0.03062)   | 0.020 (0.01507 - 0.02428)   |
| TajD              | -0.558 (-0.847 - 0.083)     | -0.557 (-0.857 - -0.117)    | -0.216 (-0.489 - 0.082)     |
| $S_e/S$           | 0.909 (0.727 - 1.000)       | 0.905 (0.762 - 1.000)       | 0.795 (0.705 - 0.872)       |

Table S4: *M. tonkeana* polymorphism ( $n = 1$  female, 8 males). Labels follow Table S3.

| Statistic         | plusminus                   | 1000to50000                 | 51000plus                   |
|-------------------|-----------------------------|-----------------------------|-----------------------------|
| <i>aDNA</i>       |                             |                             |                             |
| Sites             | 620178                      | 1076052                     | 3606494                     |
| RADtags           | 5312                        | 9329                        | 31803                       |
| <i>S</i>          | 4650 (4520 - 4783)          | 8385 (8205 - 8572)          | 31344 (31000 - 31691)       |
| $\theta_W$        | 0.00218 (0.00212 - 0.00224) | 0.00227 (0.00222 - 0.00232) | 0.00253 (0.00250 - 0.00255) |
| $\pi$             | 0.00164 (0.00158 - 0.00169) | 0.00172 (0.00167 - 0.00176) | 0.00190 (0.00188 - 0.00193) |
| divergence        | 0.06114 (0.06050 - 0.06175) | 0.06425 (0.06376 - 0.06474) | 0.06672 (0.06646 - 0.06699) |
| $\pi$ /divergence | 0.027 (0.02582 - 0.02779)   | 0.027 (0.02602 - 0.02748)   | 0.029 (0.02813 - 0.02893)   |
| TajD              | -1.069 (-1.125 - -1.009)    | -1.034 (-1.076 - -0.990)    | -1.056 (-1.079 - -1.034)    |
| Se/S              | 0.512 (0.498 - 0.526)       | 0.492 (0.481 - 0.503)       | 0.502 (0.496 - 0.507)       |
| <i>xDNA</i>       |                             |                             |                             |
| Sites             | 14076                       | 24685                       | 95369                       |
| RADtags           | 127                         | 224                         | 892                         |
| <i>S</i>          | 41 (29 - 54)                | 44 (31 - 57)                | 253 (225 - 285)             |
| $\theta_W$        | 0.00107 (0.00076 - 0.00141) | 0.00066 (0.00046 - 0.00085) | 0.00098 (0.00087 - 0.00110) |
| $\pi$             | 0.00094 (0.00066 - 0.00126) | 0.00058 (0.00040 - 0.00076) | 0.00085 (0.00074 - 0.00096) |
| divergence        | 0.05448 (0.05059 - 0.05896) | 0.05228 (0.04931 - 0.05522) | 0.05786 (0.05633 - 0.05961) |
| $\pi$ /divergence | 0.017 (0.01197 - 0.02328)   | 0.011 (0.00757 - 0.01474)   | 0.015 (0.01283 - 0.01663)   |
| TajD              | -0.626 (-1.131 - -0.087)    | -0.565 (-1.116 - -0.004)    | -0.691 (-0.895 - -0.484)    |
| Se/S              | 0.585 (0.439 - 0.732)       | 0.591 (0.455 - 0.727)       | 0.565 (0.506 - 0.628)       |

Table S5: *M. maura* polymorphism ( $n = 2$  females, 3 males). Labels follow Table S1.

| Statistic         | plusminus                   | 1000to50000                 | 51000plus                   |
|-------------------|-----------------------------|-----------------------------|-----------------------------|
| <i>aDNA</i>       |                             |                             |                             |
| Sites             | 570287                      | 1007276                     | 3332818                     |
| RADtags           | 5198                        | 9220                        | 31199                       |
| <i>S</i>          | 2530 (2431 - 2643)          | 4469 (4345 - 4598)          | 16465 (16219 - 16718)       |
| $\theta_W$        | 0.00157 (0.00151 - 0.00164) | 0.00157 (0.00152 - 0.00161) | 0.00175 (0.00172 - 0.00177) |
| $\pi$             | 0.00156 (0.00149 - 0.00163) | 0.00150 (0.00146 - 0.00155) | 0.00169 (0.00166 - 0.00172) |
| divergence        | 0.06197 (0.06130 - 0.06267) | 0.06494 (0.06440 - 0.06549) | 0.06756 (0.06726 - 0.06784) |
| $\pi$ /divergence | 0.025 (0.02404 - 0.02635)   | 0.023 (0.02234 - 0.02385)   | 0.025 (0.02460 - 0.02546)   |
| TajD              | -0.032 (-0.111 - 0.043)     | -0.214 (-0.270 - -0.157)    | -0.161 (-0.192 - -0.127)    |
| Se/S              | 0.397 (0.379 - 0.417)       | 0.442 (0.427 - 0.457)       | 0.423 (0.415 - 0.431)       |
| <i>xDNA</i>       |                             |                             |                             |
| Sites             | 9447                        | 18642                       | 65077                       |
| RADtags           | 101                         | 198                         | 760                         |
| <i>S</i>          | 15 (8 - 23)                 | 30 (20 - 42)                | 101 (81 - 121)              |
| $\theta_W$        | 0.00076 (0.00041 - 0.00117) | 0.00077 (0.00051 - 0.00108) | 0.00074 (0.00060 - 0.00089) |
| $\pi$             | 0.00070 (0.00036 - 0.00108) | 0.00076 (0.00049 - 0.00109) | 0.00073 (0.00058 - 0.00087) |
| divergence        | 0.05305 (0.04828 - 0.05875) | 0.05086 (0.04763 - 0.05426) | 0.05987 (0.05803 - 0.06186) |
| $\pi$ /divergence | 0.013 (0.00677 - 0.02132)   | 0.015 (0.00971 - 0.02162)   | 0.012 (0.00974 - 0.01463)   |
| TajD              | -0.609 (-1.200 - 0.132)     | -0.104 (-0.674 - 0.449)     | -0.201 (-0.475 - 0.103)     |
| Se/S              | 0.800 (0.600 - 1.000)       | 0.633 (0.467 - 0.800)       | 0.663 (0.574 - 0.752)       |

Table S6: *M. heckii* polymorphism ( $n = 4$  females, 2 males). Labels follow Table S1.

| Statistic         | plusminus                   | 1000to50000                 | 51000plus                   |
|-------------------|-----------------------------|-----------------------------|-----------------------------|
| <i>aDNA</i>       |                             |                             |                             |
| Sites             | 571933                      | 999066                      | 3375989                     |
| RADtags           | 5187                        | 9182                        | 31368                       |
| $S$               | 2957 (2851 - 3072)          | 5264 (5118 - 5395)          | 20390 (20110 - 20658)       |
| $\theta_W$        | 0.00171 (0.00165 - 0.00178) | 0.00174 (0.00170 - 0.00179) | 0.00200 (0.00197 - 0.00203) |
| $\pi$             | 0.00145 (0.00139 - 0.00151) | 0.00149 (0.00144 - 0.00153) | 0.00175 (0.00172 - 0.00178) |
| divergence        | 0.06186 (0.06119 - 0.06253) | 0.06493 (0.06441 - 0.06545) | 0.06735 (0.06705 - 0.06765) |
| $\pi$ /divergence | 0.023 (0.02240 - 0.02440)   | 0.023 (0.02221 - 0.02364)   | 0.026 (0.02554 - 0.02640)   |
| TajD              | -0.736 (-0.807 - -0.670)    | -0.688 (-0.745 - -0.636)    | -0.592 (-0.619 - -0.564)    |
| $S_e/S$           | 0.524 (0.506 - 0.542)       | 0.508 (0.495 - 0.521)       | 0.489 (0.482 - 0.496)       |
| <i>xDNA</i>       |                             |                             |                             |
| Sites             | 11500                       | 21152                       | 83301                       |
| RADtags           | 115                         | 211                         | 870                         |
| $S$               | 13 (7 - 21)                 | 28 (18 - 38)                | 144 (121 - 168)             |
| $\theta_W$        | 0.00050 (0.00027 - 0.00080) | 0.00058 (0.00037 - 0.00079) | 0.00076 (0.00064 - 0.00088) |
| $\pi$             | 0.00048 (0.00023 - 0.00076) | 0.00054 (0.00035 - 0.00076) | 0.00071 (0.00060 - 0.00083) |
| divergence        | 0.05360 (0.04946 - 0.05778) | 0.05168 (0.04858 - 0.05493) | 0.05892 (0.05717 - 0.06061) |
| $\pi$ /divergence | 0.009 (0.00430 - 0.01429)   | 0.010 (0.00666 - 0.01511)   | 0.012 (0.01012 - 0.01412)   |
| TajD              | -0.244 (-1.069 - 0.668)     | -0.410 (-0.953 - 0.243)     | -0.404 (-0.640 - -0.130)    |
| $S_e/S$           | 0.615 (0.385 - 0.846)       | 0.643 (0.464 - 0.821)       | 0.653 (0.569 - 0.729)       |

Table S7: Parameter estimates from model fitting for *M. nemestrina* from Borneo ( $n = 4$ ) polymorphism data. Models indicated with abbreviations and symbols that are defined in the Methods and discussed in detail in Evans et al. 2014.  $\bar{x}$  indicates weighted average of parameter values.

| model                                | $\theta_{01X}$        | $\theta_{10X}$        | $\gamma_X$        | $\theta_{01A}$ | $\theta_{10A}$ | $\gamma_A$ | $\lambda$   | $\rho_1$ | $\tau_1$ | $\ln L$      | $\delta AIC$ | wAIC  |
|--------------------------------------|-----------------------|-----------------------|-------------------|----------------|----------------|------------|-------------|----------|----------|--------------|--------------|-------|
| <i>One Epoch</i>                     |                       |                       |                   |                |                |            |             |          |          |              |              |       |
| $\infty$                             | 0.00195               | 0.00058               | 1.13186           | 0.00439        | 0.00114        | 1.44463    | -           | -        | -        | -3050429.949 | 357.59       | 0.000 |
| <i>Two Epochs</i>                    |                       |                       |                   |                |                |            |             |          |          |              |              |       |
| full                                 | 0.00137               | 0.00049               | 0.93517           | 0.00253        | 0.00078        | 1.26642    | 2.313       | 2.359    | 0.652    | -3050249.900 | 3.49         | 0.068 |
| $\gamma_A = 0$                       | 0.00125               | 0.00044               | 0.95318           | 0.00004        | 0.00004        | 0(fixed)   | 95.451      | 100.000  | 0.898    | -3051716.354 | 2934.40      | 0.000 |
| $\gamma_X = 0.75\gamma_A$            | 0.00106               | 0.00037               | 0.75 $\gamma_A$   | 0.00254        | 0.00079        | 1.26558    | 0.75(fixed) | 2.348    | 0.645    | -3050250.156 | 0.00         | 0.386 |
| $\gamma_X = 0$                       | 0.00089               | 0.00080               | 0(fixed)          | 0.00253        | 0.00078        | 1.26648    | 2.405       | 2.360    | 0.653    | -3050252.877 | 7.44         | 0.009 |
| $\gamma_X = \lambda\gamma_A$         | 0.00115               | 0.00036               | $\lambda\gamma_A$ | 0.00254        | 0.00078        | 1.26540    | 0.838       | 2.350    | 0.646    | -3050250.108 | 1.90         | 0.149 |
| $\lambda = 0.75$                     | 0.00110               | 0.00036               | 1.02612           | 0.00254        | 0.00078        | 1.26545    | 0.75(fixed) | 2.349    | 0.646    | -3050250.139 | 1.96         | 0.145 |
| $\theta_{01A} = \theta_{10A}$        | 0.00128               | 0.00046               | 0.91700           | $\theta_{10A}$ | 0.00144        | 0.08210    | 1.632       | 2.788    | 0.436    | -3051539.332 | 2580.35      | 0.000 |
| $\theta_{01X} = \lambda\theta_{10A}$ | $\lambda\theta_{01A}$ | 0.00030               | 1.11559           | 0.00254        | 0.00078        | 1.26551    | 0.400       | 2.349    | 0.646    | -3050250.332 | 2.35         | 0.119 |
| $\theta_{01X} = \theta_{10X}$        | $\theta_{10X}$        | 0.00084               | -0.10042          | 0.00253        | 0.00078        | 1.26641    | 2.356       | 2.359    | 0.652    | -3050253.556 | 8.80         | 0.005 |
| $\theta_{10X} = \lambda\theta_{10A}$ | 0.00099               | $\lambda\theta_{10A}$ | 1.06700           | 0.00254        | 0.00078        | 1.26566    | 0.394       | 2.349    | 0.646    | -3050250.336 | 2.36         | 0.119 |
| $\bar{x}$                            | 0.00108               | 0.00037               | 0.99594           | 0.00254        | 0.00078        | 1.26560    | 0.808       | 2.349    | 0.646    |              |              |       |

Table S8: Parameter estimates from model fitting of *M. tonkeana* data ( $n = 9$ ). Labels follow Table S7.

| model                                | $\theta_{01X}$        | $\theta_{10X}$        | $\gamma_X$        | $\theta_{01A}$ | $\theta_{10A}$ | $\gamma_A$ | $\lambda$   | $\rho_1$ | $\tau_1$ | $\ln L$      | $\delta AIC$ | wAIC  |
|--------------------------------------|-----------------------|-----------------------|-------------------|----------------|----------------|------------|-------------|----------|----------|--------------|--------------|-------|
| <i>One Epoch</i>                     |                       |                       |                   |                |                |            |             |          |          |              |              |       |
| $\infty$                             | 0.00139               | 0.00055               | 0.83380           | 0.00357        | 0.00105        | 1.28046    | -           | -        | -        | -4171971.390 | 4026.82      | 0.000 |
| <i>Two Epochs</i>                    |                       |                       |                   |                |                |            |             |          |          |              |              |       |
| full                                 | 0.00072               | 0.00032               | 0.72472           | 0.00201        | 0.00077        | 1.02231    | 0.501       | 3.932    | 0.134    | -4169956.509 | 3.06         | 0.075 |
| $\gamma_A = 0$                       | 0.00066               | 0.00029               | 0.73049           | 0.00117        | 0.00123        | 0(fixed)   | 0.524       | 4.565    | 0.140    | -4171922.702 | 3933.45      | 0.000 |
| $\gamma_X = 0.75\gamma_A$            | 0.00084               | 0.00035               | 0.75 $\gamma_A$   | 0.00201        | 0.00077        | 1.02205    | 0.75(fixed) | 3.925    | 0.135    | -4169956.977 | 0.00         | 0.345 |
| $\gamma_X = 0$                       | 0.00052               | 0.00047               | 0(fixed)          | 0.00201        | 0.00077        | 1.02223    | 0.517       | 3.934    | 0.134    | -4169963.181 | 14.41        | 0.000 |
| $\gamma_X = \lambda\gamma_A$         | 0.00075               | 0.00036               | $\lambda\gamma_A$ | 0.00201        | 0.00077        | 1.02267    | 0.630       | 3.928    | 0.135    | -4169956.696 | 1.44         | 0.168 |
| $\lambda = 0.75$                     | 0.00081               | 0.00036               | 0.69784           | 0.00201        | 0.00077        | 1.02243    | 0.75(fixed) | 3.925    | 0.135    | -4169956.913 | 1.87         | 0.135 |
| $\theta_{01A} = \theta_{10A}$        | 0.00066               | 0.00029               | 0.73020           | $\theta_{10A}$ | 0.00121        | 0.04892    | 0.510       | 4.544    | 0.136    | -4171741.885 | 3571.81      | 0.000 |
| $\theta_{01X} = \lambda\theta_{10A}$ | $\lambda\theta_{01A}$ | 0.00027               | 0.84651           | 0.00202        | 0.00077        | 1.02178    | 0.339       | 3.940    | 0.133    | -4169957.061 | 2.17         | 0.117 |
| $\theta_{01X} = \theta_{10X}$        | $\theta_{10X}$        | 0.00048               | -0.10748          | 0.00201        | 0.00077        | 1.02219    | 0.497       | 3.936    | 0.134    | -4169965.323 | 18.69        | 0.000 |
| $\theta_{10X} = \lambda\theta_{10A}$ | 0.00067               | $\lambda\theta_{10A}$ | 0.69695           | 0.00202        | 0.00077        | 1.02264    | 0.390       | 3.937    | 0.133    | -4169956.751 | 1.55         | 0.159 |
| $\bar{x}$                            | 0.00077               | 0.00033               | 0.73158           | 0.00201        | 0.00077        | 1.02229    | 0.606       | 3.930    | 0.134    |              |              |       |

Table S9: Parameter estimates from model fitting of *M. maura* ( $n = 6$ ) data. Labels follow Table S7.

| model                                | $\theta_{01X}$        | $\theta_{10X}$        | $\gamma_X$        | $\theta_{01A}$ | $\theta_{10A}$ | $\gamma_A$ | $\lambda$   | $\rho_1$ | $\tau_1$ | $\ln L$      | $\delta AIC$ | wAIC  |
|--------------------------------------|-----------------------|-----------------------|-------------------|----------------|----------------|------------|-------------|----------|----------|--------------|--------------|-------|
| <i>One Epoch</i>                     |                       |                       |                   |                |                |            |             |          |          |              |              |       |
| $\infty$                             | 0.00104               | 0.00039               | 0.87006           | 0.00233        | 0.00089        | 1.05198    | -           | -        | -        | -3034844.889 | 0.00         | 0.477 |
| <i>Two Epochs</i>                    |                       |                       |                   |                |                |            |             |          |          |              |              |       |
| full                                 | 0.00097               | 0.00038               | 0.83765           | 0.00203        | 0.00078        | 1.04255    | 14.460      | 1.157    | 5.000    | -3034844.676 | 5.57         | 0.029 |
| $\gamma_A = 0$                       | 0.00029               | 0.00008               | 1.16941           | 0.00023        | 0.00025        | 0(fixed)   | 2.352       | 6.956    | 2.249    | -3035631.009 | 1576.24      | 0.000 |
| $\gamma_X = 0.75\gamma_A$            | 0.00100               | 0.00041               | 0.75 $\gamma_A$   | 0.00234        | 0.00089        | 1.05618    | 0.75(fixed) | 0.010    | 0.003    | -3034844.769 | 1.76         | 0.198 |
| $\gamma_X = 0$                       | 0.00066               | 0.00060               | 0(fixed)          | 0.00201        | 0.00078        | 1.04193    | 14.455      | 1.168    | 5.000    | -3034847.515 | 9.25         | 0.005 |
| $\gamma_X = \lambda\gamma_A$         | 0.00104               | 0.00039               | $\lambda\gamma_A$ | 0.00234        | 0.00089        | 1.05588    | 0.832       | 0.010    | 0.004    | -3034844.741 | 3.70         | 0.075 |
| $\lambda = 0.75$                     | 0.00102               | 0.00039               | 0.86792           | 0.00229        | 0.00088        | 1.04768    | 0.75(fixed) | 1.022    | 1.223    | -3034844.839 | 3.90         | 0.068 |
| $\theta_{01A} = \theta_{10A}$        | 0.00090               | 0.00037               | 0.79876           | $\theta_{10A}$ | 0.00118        | 0.08340    | 3.370       | 1.416    | 1.095    | -3035506.559 | 1327.34      | 0.000 |
| $\theta_{01X} = \lambda\theta_{10A}$ | $\lambda\theta_{01A}$ | 0.00039               | 0.87835           | 0.00234        | 0.00089        | 1.05552    | 0.446       | 0.010    | 0.003    | -3034844.767 | 3.76         | 0.073 |
| $\theta_{01X} = \theta_{10X}$        | $\theta_{10X}$        | 0.00063               | -0.10469          | 0.00202        | 0.00078        | 1.04236    | 14.816      | 1.161    | 5.000    | -3034848.278 | 10.78        | 0.002 |
| $\theta_{10X} = \lambda\theta_{10A}$ | 0.00104               | $\lambda\theta_{10A}$ | 0.87110           | 0.00234        | 0.00089        | 1.05555    | 0.443       | 0.010    | 0.003    | -3034844.767 | 3.76         | 0.073 |
| $\bar{x}$                            | 0.00103               | 0.00040               | 0.84863           | 0.00232        | 0.00089        | 1.05298    | 0.851       | 0.116    | 0.266    |              |              |       |



Table S10: Parameter estimates from model fitting of *M. heckii* data ( $n = 6$ ). Labels follow Table S7.

| model                                | $\theta_{01X}$        | $\theta_{10X}$        | $\gamma_X$        | $\theta_{01A}$ | $\theta_{10A}$ | $\gamma_A$ | $\lambda$   | $\rho_1$ | $\tau_1$ | $\ln L$      | $\delta AIC$ | wAIC  |
|--------------------------------------|-----------------------|-----------------------|-------------------|----------------|----------------|------------|-------------|----------|----------|--------------|--------------|-------|
| <i>One Epoch</i>                     |                       |                       |                   |                |                |            |             |          |          |              |              |       |
| $\infty$                             | 0.00098               | 0.00045               | 0.68700           | 0.00294        | 0.00089        | 1.28375    | -           | -        | -        | -3073983.524 | 744.36       | 0.000 |
| <i>Two Epochs</i>                    |                       |                       |                   |                |                |            |             |          |          |              |              |       |
| full                                 | 0.00067               | 0.00034               | 0.57742           | 0.00213        | 0.00078        | 1.09147    | 0.502       | 2.526    | 0.132    | -3073609.850 | 3.01         | 0.063 |
| $\gamma_A = 0$                       | 0.00064               | 0.00032               | 0.57000           | 0.00121        | 0.00131        | 0(fixed)   | 0.614       | 2.890    | 0.155    | -3074877.126 | 2535.57      | 0.000 |
| $\gamma_X = 0.75\gamma_A$            | 0.00081               | 0.00032               | 0.75 $\gamma_A$   | 0.00213        | 0.00078        | 1.09019    | 0.75(fixed) | 2.517    | 0.134    | -3073610.343 | 0.00         | 0.287 |
| $\gamma_X = 0$                       | 0.00051               | 0.00046               | 0(fixed)          | 0.00213        | 0.00078        | 1.09144    | 0.502       | 2.528    | 0.132    | -3073612.043 | 5.40         | 0.019 |
| $\gamma_X = \lambda\gamma_A$         | 0.00068               | 0.00035               | $\lambda\gamma_A$ | 0.00213        | 0.00078        | 1.09148    | 0.521       | 2.525    | 0.132    | -3073609.852 | 1.02         | 0.172 |
| $\lambda = 0.75$                     | 0.00073               | 0.00037               | 0.57960           | 0.00213        | 0.00078        | 1.09133    | 0.75(fixed) | 2.517    | 0.134    | -3073609.974 | 1.26         | 0.153 |
| $\theta_{01A} = \theta_{10A}$        | 0.00064               | 0.00032               | 0.56993           | $\theta_{10A}$ | 0.00127        | 0.08219    | 0.595       | 2.895    | 0.150    | -3074690.970 | 2163.25      | 0.000 |
| $\theta_{01X} = \lambda\theta_{10A}$ | $\lambda\theta_{01A}$ | 0.00029               | 0.64843           | 0.00214        | 0.00078        | 1.09148    | 0.287       | 2.542    | 0.129    | -3073610.134 | 1.58         | 0.130 |
| $\theta_{01X} = \theta_{10X}$        | $\theta_{10X}$        | 0.00048               | -0.10659          | 0.00213        | 0.00078        | 1.09144    | 0.495       | 2.528    | 0.132    | -3073612.931 | 7.18         | 0.008 |
| $\theta_{10X} = \lambda\theta_{10A}$ | 0.00064               | $\lambda\theta_{10A}$ | 0.56548           | 0.00213        | 0.00078        | 1.09166    | 0.422       | 2.531    | 0.131    | -3073609.877 | 1.07         | 0.168 |
| $\bar{x}$                            | 0.00070               | 0.00034               | 0.63586           | 0.00213        | 0.00078        | 1.09112    | 0.573       | 2.525    | 0.133    |              |              |       |

Table S11: Weighted average of parameter estimates over all models for *M. memestrina* from Borneo, *M. hecki*, and *M. tonkeana*. Model averages are not reported for *M. mauru* because the equilibrium model was not rejected and the  $\lambda$  parameter therefore could not be estimated (Supplementary Table S9). As described in the Supplement,  $\theta_{11X}$  is the polymorphism parameter for sites on the X where the derived mutation is an A or T,  $\theta_{10X}$  is the polymorphism parameter for sites on the X where the derived mutation is an G or C,  $\gamma_X$  is the selection parameter for GC content on the X.  $\theta_{01A}$ ,  $\theta_{10A}$ , and  $\gamma_A$  are the corresponding parameters for the autosomes.  $\lambda$ ,  $\rho_1$ , and  $\tau_1$  refer respectively to the X/A polymorphism ratio, the ratio of the current to ancestral population size, and number of generations before the present that the population size changed

| Species                     | $\theta_{01X}$ | $\theta_{10X}$ | $\gamma_X$ | $\theta_{01A}$ | $\theta_{10A}$ | $\gamma_A$ | $\lambda$ | $\rho_1$ | $\tau_1$ |
|-----------------------------|----------------|----------------|------------|----------------|----------------|------------|-----------|----------|----------|
| <i>M. memestrina</i> Borneo | 0.00108        | 0.00037        | 0.99594    | 0.00254        | 0.00078        | 1.26560    | 0.808     | 2.349    | 0.646    |
| <i>M. hecki</i>             | 0.00070        | 0.00034        | 0.63586    | 0.00213        | 0.00078        | 1.09112    | 0.573     | 2.525    | 0.133    |
| <i>M. tonkeana</i>          | 0.00077        | 0.00033        | 0.73158    | 0.00201        | 0.00077        | 1.02229    | 0.606     | 3.930    | 0.134    |

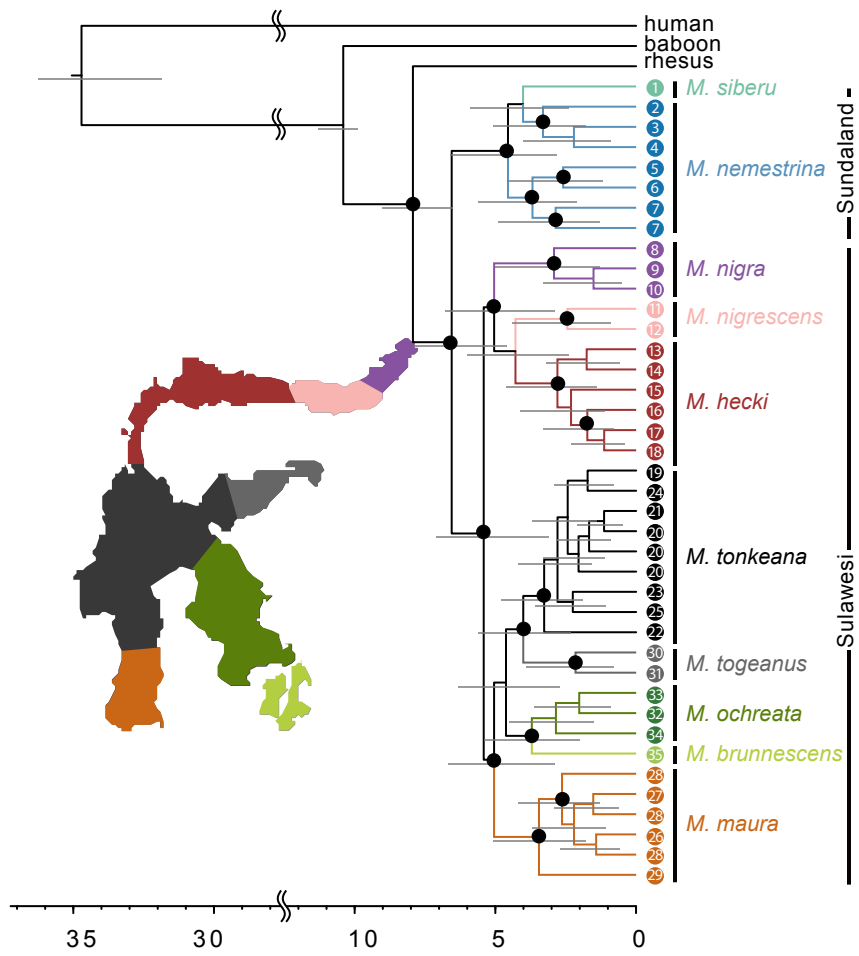

Figure S1: Chronogram estimated from RADseq data from the X chromosome. Labels follow Fig 2.

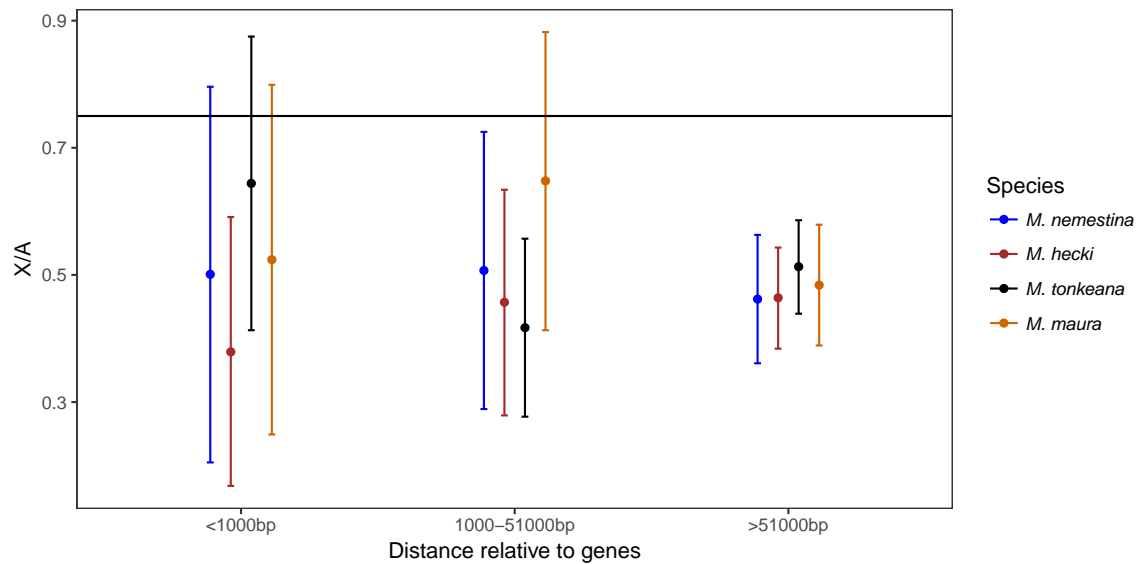

Figure S2: X/A polymorphism ratios (X/A) based on RADseq data for four species. Ratios were calculated in three genomic categories: (1) exonic and intronic sequences and flanking regions less than 1000 bp from genes (<1000bp), (2) nongenic regions that are between 1,000 and 51,000 bp from genes (1000-51000bp), and (3) nongenic regions that are greater than 51,000 bp from genes (>51000bp). Bars indicate 95% confidence intervals and accommodate uncertainty in polymorphism and divergence. A horizontal line indicates the 0.75 expectation.

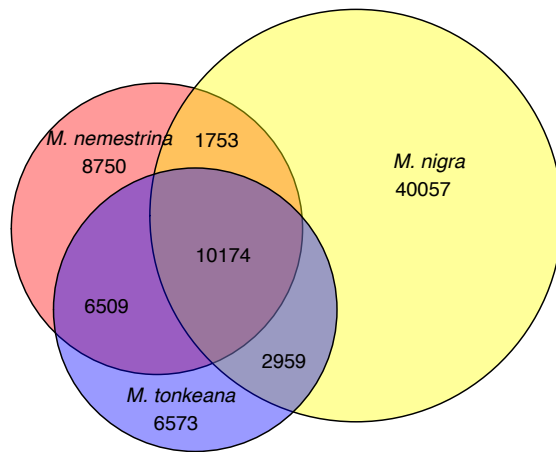

Figure S3: A Euler diagram of the number of sites in the non-pseudoautosomal region of the X chromosome for which a heterozygous genotype was inferred for one or more of the three individuals used in the analysis of gene flow across Wallace's Line. Numbers in each region of the chart refer to the number of shared or unshared heterozygous genotypes, and is based on ~57.5 million genotyped sites in each individual after discarding repetitive regions. Most of the (pseudo-) heterozygous genotypes in each male were shared with the other, whereas most of the heterozygous genotypes in the female were not shared with either male. This analysis is consistent with the proposal that most of the heterozygous genotypes in the female are real.
